# Supplementary material for: Sex-specific effects of microbiome perturbations on cerebral Aβ amyloidosis and microglia phenotypes
Source: PubMed Central journal article supplement — J Exp Med. 2019 May 16;216(7):1542–60. doi: 10.1084/jem.20182386 (PMC6605759; doi:10.1084/jem.20182386), 2019-05-16
Supplement: JEM_20182386_sm.pdf [file JEM_20182386_sm.pdf]

## Supplemental material

Dodiya et al., <https://doi.org/10.1084/jem.20182386>

### A Western blot analysis using the human APP-specific 6E10 antibody

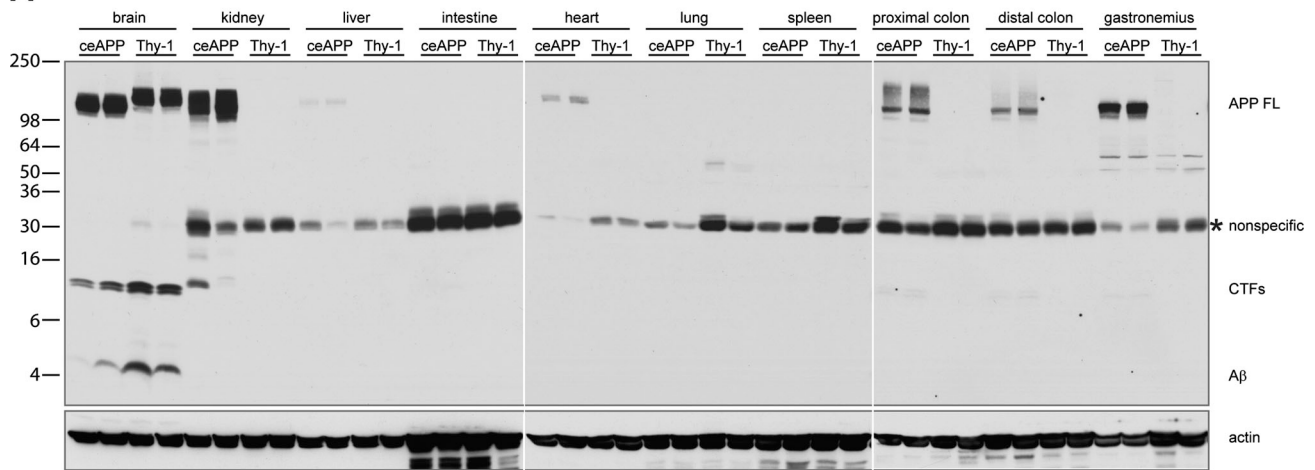

Figure S1. **APP<sub>swe</sub> is expressed specifically in the brains of APPPS1-21 mice that coexpress APP<sub>SWE</sub> and PS1<sub>L166P</sub>.** Western blot using human APP-specific 6E10 antibody to detect steady-state levels of full-length human APP-FL, β-CTF, and Aβ peptides in detergent-soluble tissue lysates of 3-mo-old APPPS1-21 mice compared with 8-mo-old APP<sub>SWE</sub>/PS1<sub>ΔE9</sub> mice (Jankowsky et al., 2002) that were used in earlier studies (Minter et al., 2016, 2017). Note the levels of full-length APP<sub>swe</sub> are similar in the brains of APPPS1-1 and APP<sub>SWE</sub>/PS1<sub>ΔE9</sub> mice (compare lanes 1 and 2 with 3 and 4). *n* = 2.

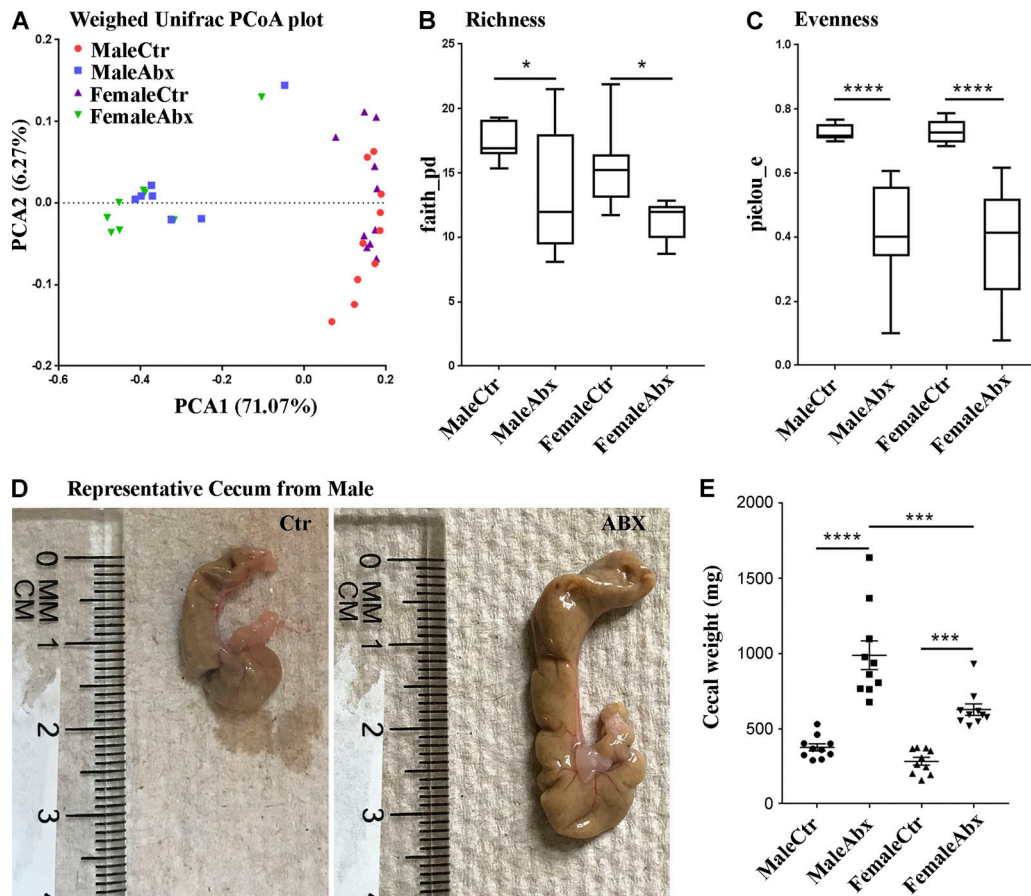

Figure S2. **Microbiome diversity at P22 and cecal weight analysis at week 7 in male and female APPPS1-21 mice ( $n = 10/\text{group}$ ).** **(A)** PCoA plot at P22 generated by using weighted versions of the UniFrac distance metric. The two components explained 71.07% of the variance. **(B and C)** At P22, both a diversity values (species richness [B] and evenness [C]) were significantly lower in the ABX-treatment group compared with control (Ctr; Faith's phylogenetic diversity, two-way ANOVA:  $F_{[1,34]} = 17.31$ ,  $P = 0.0002$ ; Pielou's evenness, two-way ANOVA:  $F_{[1,34]} = 76.19$ ,  $P < 0.0001$ ). Sex or an interaction between sex and ABX treatment showed no significant difference in either richness or evenness ( $P > 0.05$ ). Post hoc analysis showed significantly reduced richness and evenness in ABX-treated males (Faith's phylogenetic diversity:  $P = 0.0351$ ; Pielou's evenness:  $P < 0.0001$ ) and ABX-treated females (Faith's phylogenetic diversity:  $P = 0.0229$ , Pielou's evenness:  $P < 0.0001$ ) compared with their vehicle-treated counterparts. **(D)** Representative cecal images from vehicle- or ABX-treated male mice at the time of necropsy. **(E)** Cecal weight analysis wherein two-way ANOVA showed significant effect of sex ( $F_{[1, 36]} = 17.51$ ,  $P = 0.0002$ ), ABX ( $F_{[1, 36]} = 77.39$ ,  $P < 0.0001$ ), and an interaction between sex and ABX ( $F_{[1, 36]} = 6.104$ ,  $P = 0.0184$ ). Significantly larger ceca were observed in ABX-treated males compared with vehicle-treated males ( $P < 0.0001$ ), ABX-treated females compared with vehicle-treated females ( $P = 0.0004$ ), and ABX-treated males compared with ABX-treated females ( $P = 0.0002$ ). Data are mean  $\pm$  SEM. \*,  $P < 0.05$ ; \*\*\*,  $P < 0.001$ ; \*\*\*\*,  $P < 0.0001$ . Ctr, Control; PCA1, principal coordinate 1; PCA2, principal coordinate 2.

**A Plasma Cytokine Array Analysis - Male (Vehicle/Abx) @ 7 weeks**

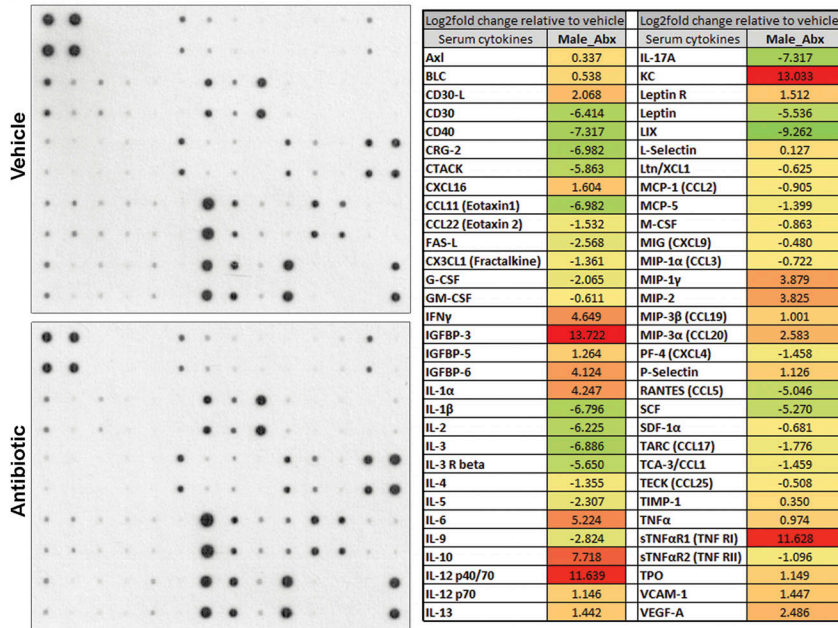

**B Plasma Cytokine Array Analysis - Female (Vehicle/Abx) @ 7 weeks**

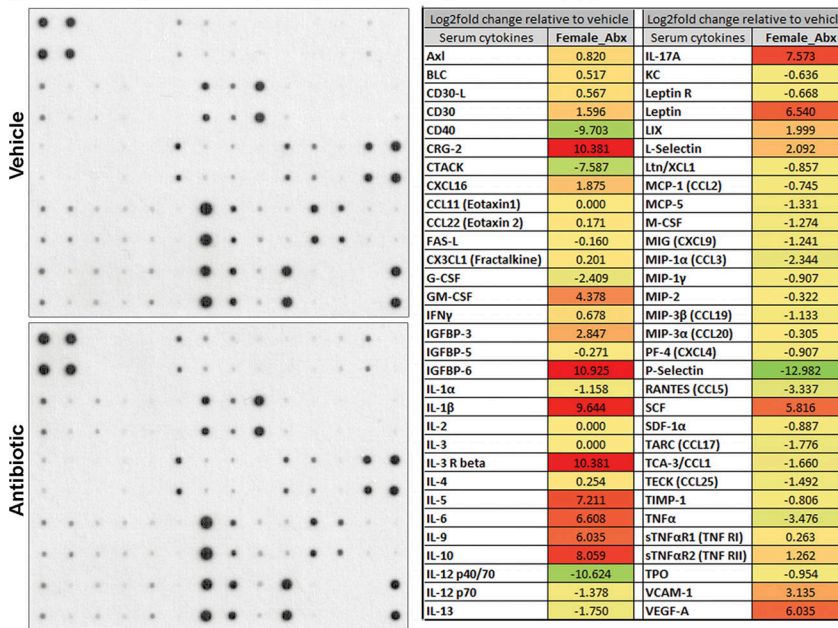

**C Female Abx cytokines compared to Male Abx**

| Serum cytokines      | Log2fold change relative to Male_Abx |  | Serum cytokines   | Log2fold change relative to Male_Abx |  |
|----------------------|--------------------------------------|--|-------------------|--------------------------------------|--|
|                      | Female_Abx                           |  |                   | Female_Abx                           |  |
| Axl                  | 0.087                                |  | IL-17A            | 7.442                                |  |
| BLC                  | 0.054                                |  | KC                | -13.026                              |  |
| CD30-L               | -0.409                               |  | Leptin R          | -0.419                               |  |
| CD30                 | -0.202                               |  | Leptin            | 5.662                                |  |
| CD40                 | -1.801                               |  | LIX               | 11.846                               |  |
| CRG-2                | 7.108                                |  | L-Selectin        | 4.134                                |  |
| CTACK                | -1.140                               |  | Ltn/XCL1          | 0.458                                |  |
| CXCL16               | -0.669                               |  | MCP-1 (CCL2)      | 0.512                                |  |
| CCL11 (Eotaxin1)     | 7.108                                |  | MCP-5             | 0.437                                |  |
| CCL22 (Eotaxin 2)    | 0.750                                |  | M-CSF             | 0.363                                |  |
| FAS-L                | 0.567                                |  | MIG (CXCL9)       | 0.029                                |  |
| CX3CL1 (Fractalkine) | 0.015                                |  | MIP-1α (CCL3)     | -0.992                               |  |
| G-CSF                | -0.801                               |  | MIP-1y            | -2.032                               |  |
| GM-CSF               | 0.931                                |  | MIP-2             | -3.562                               |  |
| IFNγ                 | -1.064                               |  | MIP-3β (CCL19)    | -0.946                               |  |
| IGFBP-3              | -0.278                               |  | MIP-3α (CCL20)    | -2.084                               |  |
| IGFBP-5              | -0.345                               |  | PF-4 (CXCL4)      | 2.136                                |  |
| IGFBP-6              | -1.862                               |  | P-Selectin        | -11.939                              |  |
| IL-1α                | -2.498                               |  | RANTES (CCL5)     | -3.072                               |  |
| IL-1β                | 6.921                                |  | SCF               | 5.396                                |  |
| IL-2                 | 6.351                                |  | SDF-1α            | 0.596                                |  |
| IL-3                 | 7.012                                |  | TARC (CCL17)      | 1.533                                |  |
| IL-3 R beta          | 5.776                                |  | TCA-3/CCL1        | 1.708                                |  |
| IL-4                 | 0.319                                |  | TECK (CCL25)      | 1.186                                |  |
| IL-5                 | 7.322                                |  | TIMP-1            | 0.434                                |  |
| IL-6                 | 0.000                                |  | TNFα              | -2.033                               |  |
| IL-9                 | 8.506                                |  | sTNFαR1 (TNF RI)  | 0.137                                |  |
| IL-10                | 0.000                                |  | sTNFαR2 (TNF RII) | 1.137                                |  |
| IL-12 p40/70         | -11.164                              |  | TPO               | -0.750                               |  |
| IL-12 p70            | -0.765                               |  | VCAM-1            | 1.274                                |  |
| IL-13                | -1.568                               |  | VEGF-A            | 5.699                                |  |

Figure S3. **ABX-altered microbiome changes affect plasma cytokines/chemokines in a sex-specific manner at week 7 in APPPS1-21 mice.** (A) Immunoblots and heatmap analysis of fold-changes in the levels of plasma cytokines/chemokines in ABX-treated male APPPS1-21 mice relative to vehicle-treated APPPS1-21 male mice. (B) Immunoblots and heatmap analysis of fold-changes in the cytokine/chemokine levels in vehicle- and ABX-treated female APPPS1-21 mice relative to vehicle-treated female APPPS1-21 mice. (C) Heatmap comparing fold-changes in the cytokine/chemokine levels in ABX-treated female APPPS1-21 mice relative to ABX-treated male APPPS1-21 mice. *n* = 10 pooled samples per membrane.

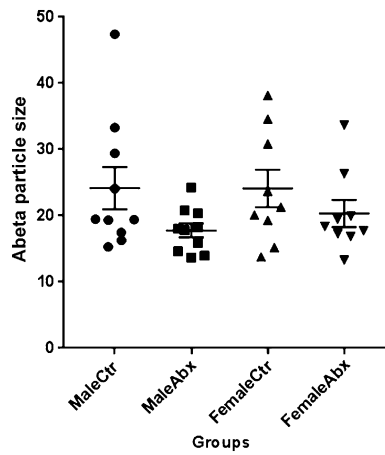

Figure S4. **A $\beta$  plaque size analysis in the cortex of APPPS1-21 mice (n = 10/group).** Quantification of plaque size in vehicle- (Ctr) and ABX-treated APPPS1-21 mice using threshold-limited particle analysis of 3D6-positive staining from six sections per case. Two-way ANOVA showed significant effect of ABX treatment ( $F_{[1,34]} = 4.424$ ,  $P = 0.0429$ ) but no effect of sex ( $F_{[1,34]} = 0.274$ ,  $P = 0.0604$ ) or ABX treatment and sex interaction ( $F_{[1,34]} = 0.2899$ ,  $P = 0.5938$ ). Post hoc comparison showed no significant differences among any groups, suggesting trends of reduction in A $\beta$  plaque size with ABX-treated males compared with vehicle-treated males. Data are mean  $\pm$  SEM.

Table S1. ANCOM significant differences in fecal microbiota at P22 (FDR P < 0.05)

|                                | Higher in Male                                                                                  | Higher in Female                                                            |
|--------------------------------|-------------------------------------------------------------------------------------------------|-----------------------------------------------------------------------------|
| <b>M_Vehicle vs. F_Vehicle</b> |                                                                                                 |                                                                             |
| <b>ESV</b>                     | <b>NS</b>                                                                                       | <b>NS</b>                                                                   |
| L7 clustered taxa              | NS                                                                                              | NS                                                                          |
| <b>M_ABX vs. F_ABX</b>         |                                                                                                 |                                                                             |
| <b>ESV</b>                     | <b>NS</b>                                                                                       | <b>NS</b>                                                                   |
| L7 clustered taxa              | NS                                                                                              | NS                                                                          |
|                                | <b>Higher in M_ABX</b>                                                                          | <b>Lower in M_ABX</b>                                                       |
| <b>M_Vehicle vs. M_ABX</b>     |                                                                                                 |                                                                             |
| ESV                            | p_Proteobacteria; c_Gammaproteobacteria; f_Moraxellaceae; g_Acinetobacter                       | p_Bacteroidetes; c_Bacteroidia; f_S24-7; g_; s_ (x2)                        |
|                                | p_Proteobacteria; c_Alphaproteobacteria; f_mitochondria                                         | p_Bacteroidetes; c_Bacteroidia; f_[Paraprevotellaceae]; g_[Prevotella]; s_  |
|                                | p_Proteobacteria; c_Betaproteobacteria; f_Comamonadaceae                                        |                                                                             |
|                                | p_Proteobacteria; c_Gammaproteobacteria; o_Pseudomonadales; f_Pseudomonadaceae                  |                                                                             |
| L7 clustered taxa              | p_Bacteroidetes; c_Flavobacteriia; f_[Weeksellaceae]; g_Cloacibacterium; s_                     | p_Bacteroidetes; c_Bacteroidia; f_Bacteroidaceae; g_Bacteroides; s_ovatus   |
|                                | p_Firmicutes; c_Bacilli; f_Lactobacillaceae; g_Lactobacillus; s_                                | p_Bacteroidetes; c_Bacteroidia; f_Prevotellaceae; g_Prevotella; s_          |
|                                | p_Firmicutes; c_Clostridia; f_Lachnospiraceae; g_; s_                                           | p_Bacteroidetes; c_Bacteroidia; f_Rikenellaceae; g_AF12; s_                 |
|                                | p_Firmicutes; c_Clostridia; f_Ruminococcaceae; g_Oscillospira; s_                               | p_Bacteroidetes; c_Bacteroidia; f_[Paraprevotellaceae]; g_[Prevotella]; s_  |
|                                | p_Proteobacteria; c_Alphaproteobacteria; f_mitochondria; ;_                                     |                                                                             |
|                                | p_Proteobacteria; c_Betaproteobacteria; f_Comamonadaceae; ;_                                    |                                                                             |
|                                | p_Proteobacteria; c_Gammaproteobacteria; f_Moraxellaceae; g_Acinetobacter; _                    |                                                                             |
|                                | p_Proteobacteria; c_Gammaproteobacteria; f_Pseudomonadaceae; ;_                                 |                                                                             |
|                                | p_Proteobacteria; c_Gammaproteobacteria; f_Pseudomonadaceae; g_Pseudomonas; _                   |                                                                             |
|                                | <b>Higher in F_ABX</b>                                                                          | <b>Lower in F_ABX</b>                                                       |
| <b>F_Vehicle vs. F_ABX</b>     |                                                                                                 |                                                                             |
| ESV                            | p_Firmicutes; c_Bacilli; o_Lactobacillales; f_Lactobacillaceae; g_Lactobacillus                 | p_Bacteroidetes; c_Bacteroidia; f_S24-7; g_; s_ (x2)                        |
|                                | p_Proteobacteria; c_Alphaproteobacteria; o_Rickettsiales; f_mitochondria                        | p_Bacteroidetes; c_Bacteroidia; f_Prevotellaceae;                           |
|                                | p_Bacteroidetes; c_Flavobacteriia; o_Flavobacteriales; f_[Weeksellaceae]; g_Cloacibacterium; s_ | p_Bacteroidetes; c_Bacteroidia; f_[Paraprevotellaceae]; g_[Prevotella]; s_  |
|                                |                                                                                                 | p_Bacteroidetes; c_Bacteroidia; f_Porphyrimonadaceae; g_Parabacteroides; s_ |
|                                |                                                                                                 | p_Bacteroidetes; c_Bacteroidia; f_[Odoribacteraceae]; g_Odoribacter; s_     |

Table S1. ANCOM significant differences in fecal microbiota at P22 (FDR P < 0.05) (Continued)

| ESV               | NS                                                                           | NS                                                                                 |
|-------------------|------------------------------------------------------------------------------|------------------------------------------------------------------------------------|
| L7 clustered taxa | p_Bacteroidetes;c_Flavobacteriia;f_[Weeksellaceae];<br>g_Cloacibacterium;s_  | p_Bacteroidetes;c_Bacteroidia;f_Bacteroidaceae;<br>g_Bacteroides;s_ovatus          |
|                   | p_Cyanobacteria;c_Chloroplast;o_Streptophyta;f_;g_;s_                        | p_Bacteroidetes;c_Bacteroidia;f_Prevotellaceae;g_Prevotella;<br>s_                 |
|                   | p_Proteobacteria;c_Alphaproteobacteria;f_mitochondria;_;                     | p_Bacteroidetes;c_Bacteroidia;f_Rikenellaceae;g_;s_                                |
|                   | p_Proteobacteria;c_Gammaproteobacteria;f_Moraxellaceae;<br>g_Acinetobacter;_ | p_Bacteroidetes;c_Bacteroidia;f_Rikenellaceae;g_AF12;s_                            |
|                   |                                                                              | p_Bacteroidetes;c_Bacteroidia;f_S24-7;g_;s_                                        |
|                   |                                                                              | p_Bacteroidetes;c_Bacteroidia;f_[Odoribacteraceae];<br>g_Odoribacter;s_            |
|                   |                                                                              | p_Bacteroidetes;c_Bacteroidia;f_[Paraprevotellaceae];g_<br>[Prevotella];s_         |
|                   |                                                                              | p_Firmicutes;c_Bacilli;f_Lactobacillaceae;g_Lactobacillus;_                        |
|                   |                                                                              | p_Firmicutes;c_Bacilli;f_Lactobacillaceae;g_Lactobacillus;s_                       |
|                   |                                                                              | p_Firmicutes;c_Clostridia;o_Clostridiales;_;                                       |
|                   |                                                                              | p_Firmicutes;c_Clostridia;o_Clostridiales;f_;g_;s_                                 |
|                   |                                                                              | p_Firmicutes;c_Clostridia;f_Clostridiaceae;g_Candidatus<br>Arthromitus;s_          |
|                   |                                                                              | p_Firmicutes;c_Clostridia;f_Lachnospiraceae;_;                                     |
|                   |                                                                              | p_Firmicutes;c_Clostridia;f_Ruminococcaceae;g_Oscillospira;s_                      |
|                   |                                                                              | p_Firmicutes;c_Clostridia;f_Ruminococcaceae;<br>g_Ruminococcus;s_                  |
|                   |                                                                              | p_Proteobacteria;c_Epsilonproteobacteria;<br>f_Helicobacteraceae;g_Helicobacter;s_ |

To determine the taxa that described the most variance between groups, ANCOM analyses of 16S rRNA sequencing data at the DADA2-inferred ESV level (taxonomy assigned via Greengenes) and clustered species levels were performed between vehicle- or ABX-treated groups at P22 in a sex-dependent manner. F\_ABX, ABX-treated female mice; F\_Vehicle, vehicle-treated female mice; M\_ABX, ABX-treated male mice; M\_Vehicle, vehicle-treated male mice.  $n = 10$ /group.

## References

- Jankowsky, J.L., A. Savonenko, G. Schilling, J. Wang, G. Xu, and D.R. Borchelt. 2002. Transgenic mouse models of neurodegenerative disease: opportunities for therapeutic development. *Curr. Neurol. Neurosci. Rep.* 2:457–464. <https://doi.org/10.1007/s11910-002-0073-7>
- Minter, M.R., C. Zhang, V. Leone, D.L. Ringus, X. Zhang, P. Oyler-Castrillo, M.W. Musch, F. Liao, J.F. Ward, D.M. Holtzman, et al. 2016. Antibiotic-induced perturbations in gut microbial diversity influences neuro-inflammation and amyloidosis in a murine model of Alzheimer's disease. *Sci. Rep.* 6:30028. <https://doi.org/10.1038/srep30028>
- Minter, M.R., R. Hinterleitner, M. Meisel, C. Zhang, V. Leone, X. Zhang, P. Oyler-Castrillo, X. Zhang, M.W. Musch, X. Shen, et al. 2017. Antibiotic-induced perturbations in microbial diversity during post-natal development alters amyloid pathology in an aged APP<sub>SWE</sub>/PS1<sub>ΔE9</sub> murine model of Alzheimer's disease. *Sci. Rep.* 7:10411. <https://doi.org/10.1038/s41598-017-11047-w>
